# Supplementary material for: Enhanced photocatalytic removal of bromate in drinking water by Au/TiO2 under ultraviolet light
Source: Royal Society of Chemistry journal article supplement (doi:10.1039/d4ra03453h), 2024-01-01
Supplement: d4ra03453h1.pdf [file d4ra03453h1.pdf]

## Supporting Information

### Enhanced photocatalytic removal of bromate in drinking water by Au/TiO<sub>2</sub> under ultraviolet light

Ying Xu <sup>a, b</sup>, Shuili Yu <sup>a, b, \*</sup>, Cong Huang <sup>c</sup>, Zheng Xu <sup>c</sup>

<sup>a</sup> State Key Laboratory of Pollution Control and Resource Reuse, College of Environmental Science and Engineering, Tongji University, Shanghai 200092, P. R. China

<sup>b</sup> Shanghai Institute of Pollution Control and Ecological Security, Shanghai 200092, P. R. China

<sup>c</sup> PowerChina Huadong Engineering Corporation Limited, Hangzhou 311122, P. R. China.

\* Corresponding authors: Shuili Yu, E-mail: ysl@tongji.edu.cn.

**Table S1. Characteristics of tap water.**

| Parameter                             |       |
|---------------------------------------|-------|
| pH                                    | 7.62  |
| Turbidity (NTU)                       | 0.15  |
| DOC (mg/L)                            | 1.31  |
| UV <sub>254</sub> (cm <sup>-1</sup> ) | 0.011 |
| DO (mg/L)                             | 7.85  |
| Chloride (mg/L)                       | 19.2  |
| Nitrate (mg N/L)                      | 1.3   |
| Sulfate (mg/L)                        | 29.1  |
| Bromide (µg/L)                        | 15.5  |
| Bromate (µg/L)                        | < 2.5 |

**Table S2. Rate constants (k) and the correlation coefficients (R<sup>2</sup>) of linear least squares regression for the photo-reduction data of BrO<sub>3</sub><sup>-</sup> over different photocatalysts.**

| Catalyst                 | k(min <sup>-1</sup> ) | R <sup>2</sup> |
|--------------------------|-----------------------|----------------|
| TiO <sub>2</sub>         | 0.0163                | 0.991          |
| 0.5% Au/TiO <sub>2</sub> | 0.0405                | 0.995          |
| 1% Au/TiO <sub>2</sub>   | 0.0707                | 0.977          |
| 5% Au/TiO <sub>2</sub>   | 0.0327                | 0.994          |

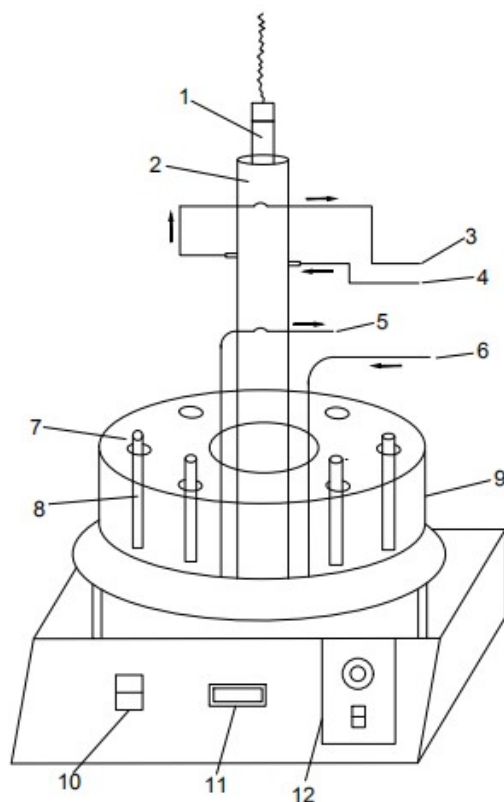

**Fig. S1. The photoreactor for reduction of  $\text{BrO}_3^-$ . (1) UV lamp; (2) quartz vessel; (3) cooling water outlet of quartz vessel; (4) cooling water inlet of quartz vessel; (5) cooling water outlet of tube holder; (6) cooling water inlet of tube holder; (7) quartz test tube; (8) reaction solution; (9) quartz rotatable tube holder; (10) rotary button; (11) temperature display; (12) magnetic stirrer button.**

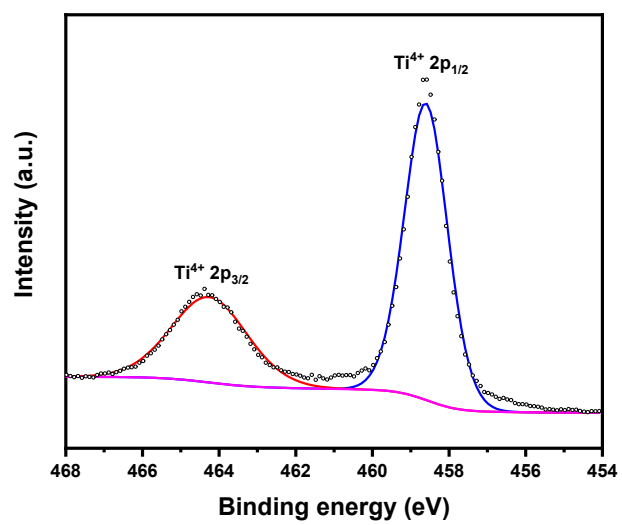

**Fig. S2.** The high-resolution XPS scans over the Ti 2p peak.

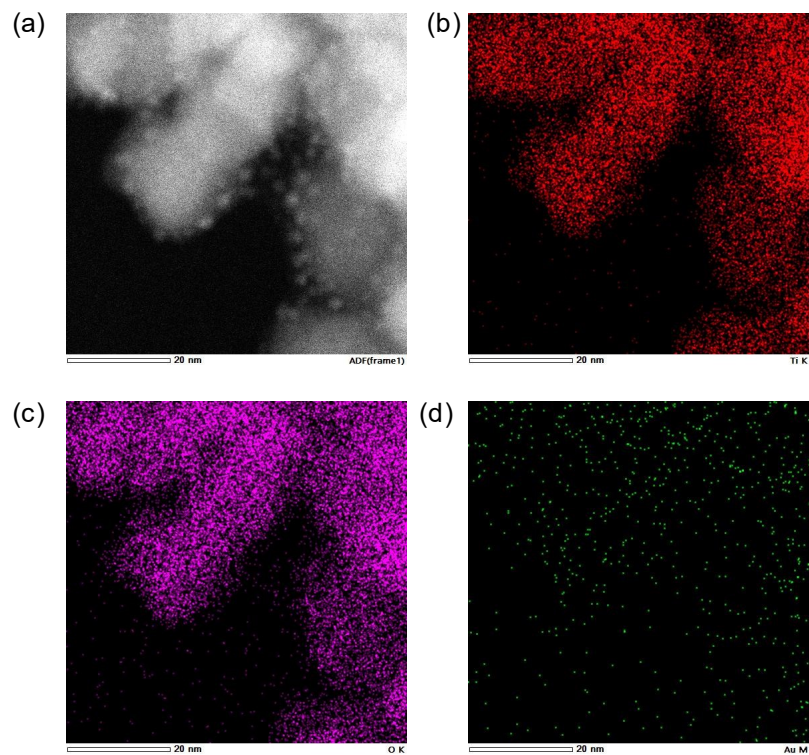

**Fig. S3. (a) TEM image and EDS mapping of (b) Ti, (c) O, and (d) Au element of the 1% Au/TiO<sub>2</sub> photocatalyst.**

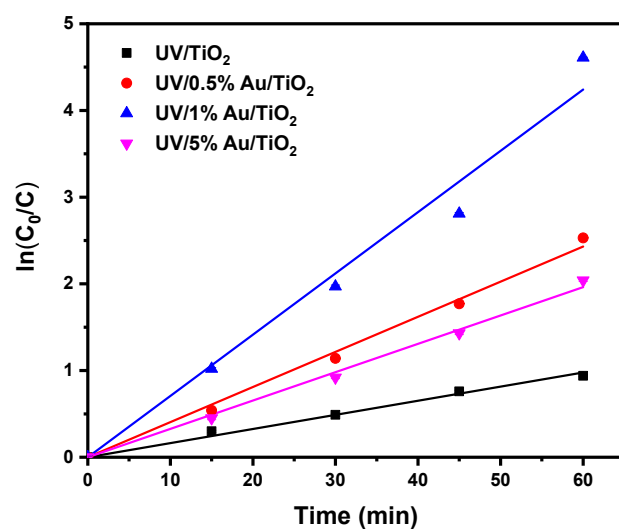

Fig. S4. The linear relationship between  $\ln(C_0/C)$  and reaction time over the different ARP.

Conditions:  $[\text{BrO}_3^-]_0=0.078$  mM (10 mg/L), catalyst dose=0.3 g/L, pH= $7.0 \pm 0.2$ , DO = 8.1 mg/L,

T= $25 \pm 0.5$  °C, and UV-L light intensity= $2.42$  mW cm<sup>-2</sup>.

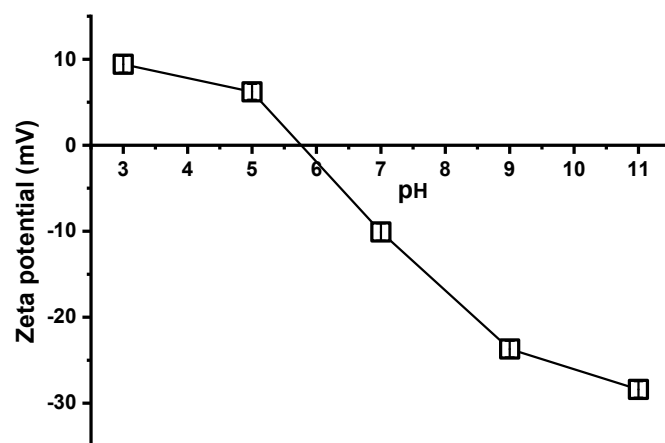

**Fig. S5. Zeta potential of 1% Au/TiO<sub>2</sub> at 0.3 g/L in DI water as a function of solution pH.**



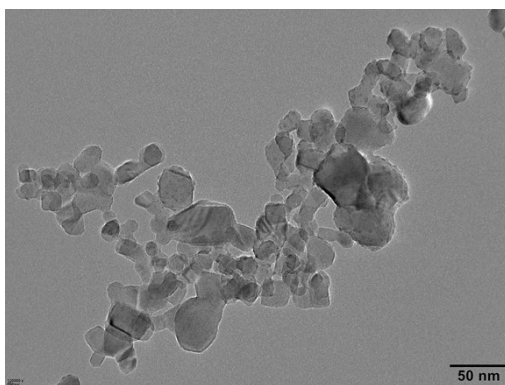

**Fig. S6. TEM image of 1% Au/TiO<sub>2</sub> photocatalyst after photocatalytic tests.**
